# Supplementary material for: Effectiveness of Schroth exercises for adolescent idiopathic scoliosis: a meta-analysis
Source: PeerJ. 2025 Jul 8;13:e19639. doi: 10.7717/peerj.19639 (PMC12248227; doi:10.7717/peerj.19639)
Supplement: Supplemental Information 9 [file peerj-13-19639-s009.xlsx]

## Sheet: Sheet1
Study	cobbangleintsample	cobbangleintmean	cobbangleintsd	cobbanglecontsample	cobbanglecontmean	cobbanglecontsd	ATRintsample	ATRintmean	ATRintsd	ATRcontsample	ATRcontmean	ATRcontsd	QOLintsample	QOLintmean	QOLintsd	QOLcontsample	QOLcontmean	QOLcontsd
Kim et al.2016	12	12	4.7	12	16	6.9
Gao et al.2021	43	26.3	5.2	21	28.1	5.2							43	4.3	0.3	21	4.1	0.6
Kocaman et al.2021	14	9.71	3.47	14	13.57	5.03	14	3.64	1.91	14	5.79	3.02	14	4.56	0.13	14	4.3	0.17
Kuru et al.2015	15	32	13	15	32	14	15	7.66	5.24	15	10.5	4.21	15	4.4	1.01	15	4.1	0.6
Mohamed et al.2021	17	14.11	1.96	17	17.46	2.37	17	5.23	0.43	17	8.17	0.72
Fang et al.2022	54	28.34	5.96	138	31.88	7.91							54	4.68	0.29	138	4.52	0.3
Schreiber et al.2016	25	27.7	8.9	25	29.1	8.8
Lee et al.2020	8	15.98	6.3	7	20.08	7.27	8	8.37	3.2	7	7.42	2.29
Duangkaew et al.2019							10	3	2.15	10	1.67	2.1
Schreiber et al.2015													25	4.25	0.15	25	4.13	0.27
HwangBo et al.2016	8	14.27	6.13	8	18.73	6.13
